# Supplementary material for: Genome-scale DNA methylome and transcriptome profiling of human neutrophils
Source: PubMed Central journal article supplement (PMC4792177; doi:10.1038/sdata.2016.19), 2016-03-15
Supplement: sdata201619-s2.pdf [file sdata201619-s2.pdf]

## **Supplementary File 1 for:**

### **Genome-scale DNA methylome and transcriptome profiling of human neutrophils**

**Aniruddha Chatterjee<sup>1, 2\*</sup>, Peter A. Stockwell<sup>3</sup>, Euan J. Rodger<sup>1</sup>, Ian M.**

**Morison<sup>1\*</sup>**

1. Department of Pathology, Dunedin School of Medicine, University of Otago, 270 Great King Street, Dunedin 9054, New Zealand institution

2. Maurice Wilkins Centre for Molecular Biodiscovery, Level 2, 3A Symonds Street, Auckland, New Zealand

3. Department of Biochemistry, University of Otago, 710 Cumberland Street, Dunedin 9054, New Zealand

\* To whom correspondence should be addressed: Aniruddha Chatterjee, Department of Pathology, Dunedin School of Medicine, University of Otago, P.O. Box 913, Dunedin, New Zealand, Telephone: +64 3 470 3455, E-mail: [aniruddha.chatterjee@otago.ac.nz](mailto:aniruddha.chatterjee@otago.ac.nz)

**Supplementary Figures S1 – S10.**

**Supplementary Tables S1.**

## Supplementary Figures

Sample No.: JEF1 Rack: Tube: 0 29/06/2011 14:01:54  
 Patient ID: Ward: Dr.:  
 Name: Birth: Sex:  
 Comments: Inst.ID: SCL Dunedin

Positive  
 Morph. Count

|        |       |   |                       |
|--------|-------|---|-----------------------|
| WBC    | 3.09  | - | [10 <sup>9</sup> /L]  |
| RBC    | 0.00  | * | [10 <sup>12</sup> /L] |
| HGB    | 0     | - | [g/L]                 |
| HCT    | 0.000 | * | [Ratio]               |
| MCV    | ----  |   | [fL]                  |
| MCH    | ----  |   | [pg]                  |
| MCHC   | ----  |   | [g/L]                 |
| PLT    | 0     | - | [10 <sup>9</sup> /L]  |
| RDW-SD | ----  |   | [fL]                  |
| RDW-CV | ----  |   | [%]                   |
| PDW    | ----  |   | [fL]                  |
| MPV    | ----  |   | [fL]                  |
| P-LCR  | ----  |   | [%]                   |
| PCT    | ----  |   | [%]                   |
| NEUT   | 2.92  | * | [10 <sup>9</sup> /L]  |
| LYMPH  | 0.08  | * | [10 <sup>9</sup> /L]  |
| MONO   | 0.00  | * | [10 <sup>9</sup> /L]  |
| EO     | 0.09  | * | [10 <sup>9</sup> /L]  |
| BASO   | 0.00  |   | [10 <sup>9</sup> /L]  |
| NRBC   |       |   | [10 <sup>9</sup> /L]  |
| IG     | 0.00  |   | [10 <sup>9</sup> /L]  |
| RET    | ----  |   | [%]                   |
| IRF    | ----  |   | [%]                   |
| LFR    | ----  |   | [%]                   |
| MFR    | ----  |   | [%]                   |
| HFR    | ----  |   | [%]                   |
| RET-He | ----  |   | [pg]                  |
| IPF    | 0.0   | * | [%]                   |

|      |   |                      |
|------|---|----------------------|
| 94.5 | * | [%]                  |
| 2.6  | * | [%]                  |
| 0.0  | * | [%]                  |
| 2.9  | * | [%]                  |
| 0.0  |   | [%]                  |
| 0.0  |   | [/100WBC]            |
| 0.0  | * | [10 <sup>9</sup> /L] |

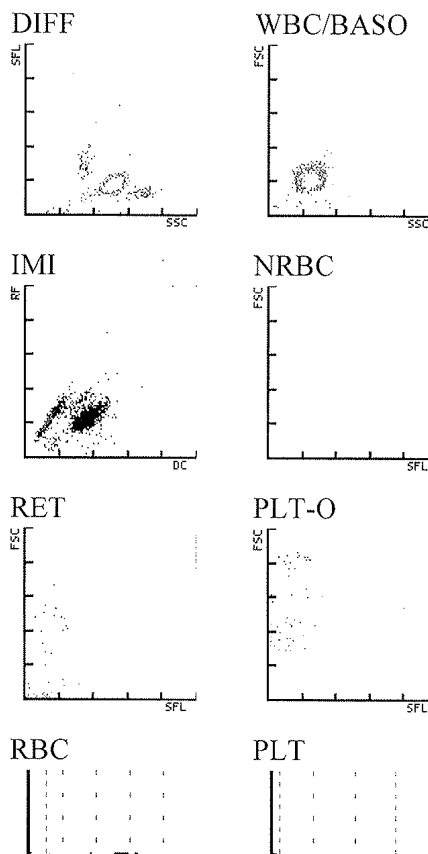

WBC IP Message(s)

RBC/RET IP Message(s)  
 RBC Abn Distribution

PLT IP Message(s)  
 Thrombocytopenia

Blasts?  
 Left Shift?

**Fig. S1: Whole blood cell count of X9010 sample before enrichment as a representative example. 200  $\mu$ L of peripheral blood was used to count the cells in XE2100 Haematology Analyser. NEUT represents neutrophils. The percentage of neutrophils was 37.2% in peripheral blood before enrichment.**

Sample No.: JEF1 Rack: Tube: 0 29/06/2011 14:01:54  
 Patient ID: Ward: Dr.:  
 Name: Birth: Sex:  
 Comments: Inst.ID: SCL Dunedin

Positive  
 Morph. Count

WBC 3.09 - [10<sup>9</sup>/L]  
 RBC 0.00 \* [10<sup>12</sup>/L]  
 HGB 0 - [g/L]  
 HCT 0.000 \* [Ratio]  
 MCV ---- [fL]  
 MCH ---- [pg]  
 MCHC ---- [g/L]  
 PLT 0 - [10<sup>9</sup>/L]  
 RDW-SD ---- [fL]  
 RDW-CV ---- [%]  
 PDW ---- [fL]  
 MPV ---- [fL]  
 P-LCR ---- [%]  
 PCT ---- [%]  
 NEUT 2.92 \* [10<sup>9</sup>/L]  
 LYMPH 0.08 \* [10<sup>9</sup>/L]  
 MONO 0.00 \* [10<sup>9</sup>/L]  
 EO 0.09 \* [10<sup>9</sup>/L]  
 BASO 0.00 [10<sup>9</sup>/L]  
 NRBC [10<sup>9</sup>/L]  
 IG 0.00 [10<sup>9</sup>/L]  
 RET ---- [%]  
 IRF ---- [%]  
 LFR ---- [%]  
 MFR ---- [%]  
 HFR ---- [%]  
 RET-He ---- [pg]  
 IPF 0.0 \* [%]

94.5 \* [%]  
 2.6 \* [%]  
 0.0 \* [%]  
 2.9 \* [%]  
 0.0 [%]  
 0.0 [%]  
 0.0 \* [10<sup>9</sup>/L]

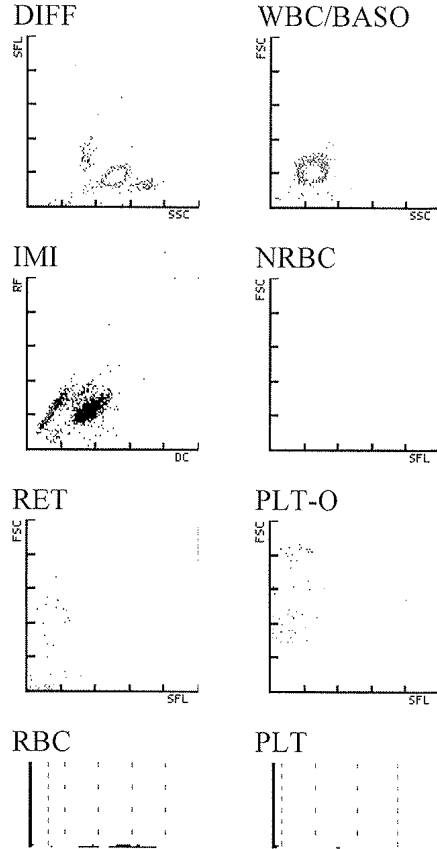

WBC IP Message(s)

RBC/RET IP Message(s)  
 RBC Abn Distribution

PLT IP Message(s)  
 Thrombocytopenia

Blasts?  
 Left Shift?

**Fig. S2: Whole blood cell count of X9010 sample after enrichment as a representative example. 200  $\mu$ L of peripheral blood was used to count the cells in XE2100 Haematology Analyser. NEUT represents neutrophils. The percentage of neutrophils was 94.2% in peripheral blood after enrichment.**

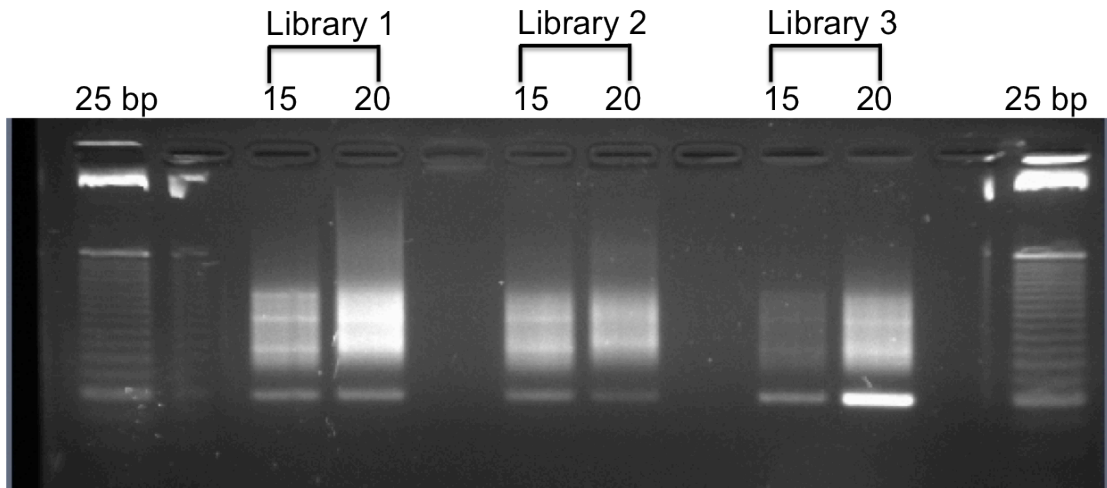

**Fig. S3: Example of three successful RRBS libraries prepared following the described protocol in the manuscript.** Three different RRBS libraries (X9012, X9014 and X9016) were amplified after bisulfite conversion with 15 and 20 PCR cycles and electrophoresed in 3% nusieve gel for 90 minutes (50 volts). Ladder: 25 bp (Invitrogen).

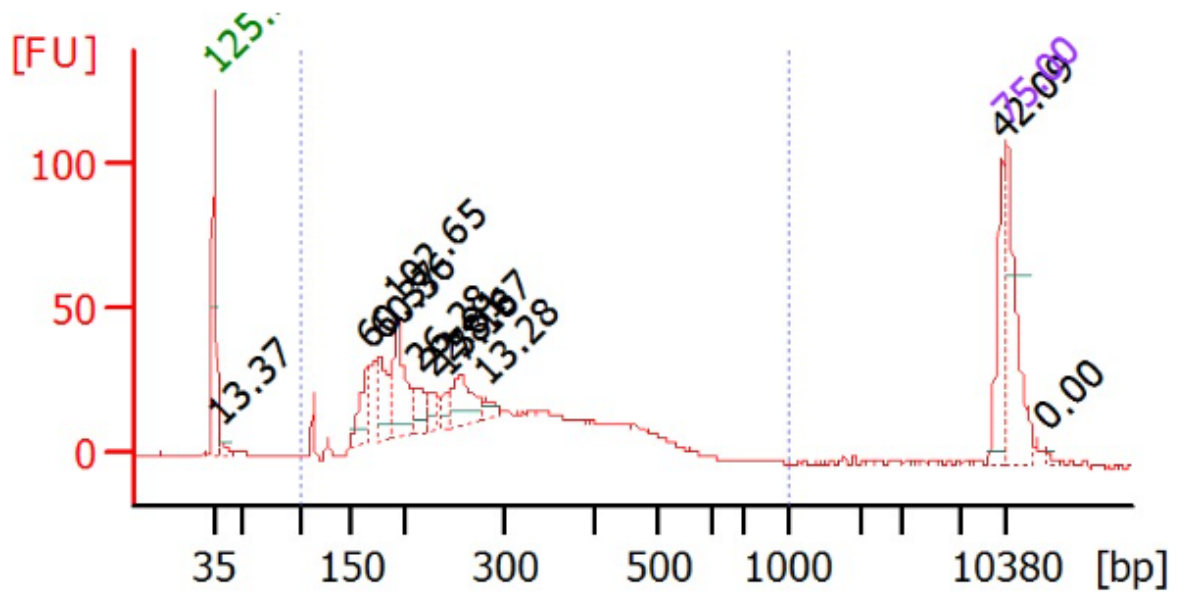

**Fig. S4: A representative bioanalyzer electropherogram of a sequenced RRBS library.** The prepared RRBS library was run on an Agilent 2100 Bioanalyzer using the high sensitivity DNA kit to determine the quality of the samples. The electropherogram displays a plot of fragment size in the x-axis (bp) versus fluorescence intensity (fluorescence units, FU) in y-axis. Peaks at 35 bp and 10380 bp represent lower and upper markers. The 150- 330 bp peaks represent the RRBS library (size after ligation of the adaptor, this corresponds to the actual size of 40-220 bp DNA fragments).

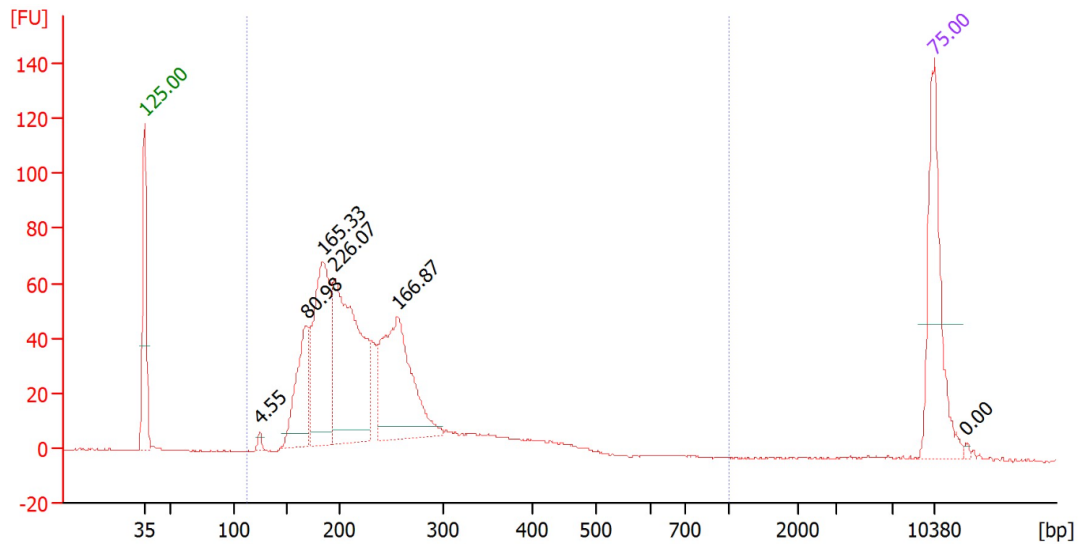

**Fig. S5: A representative bioanalyzer electropherogram of a sequenced RRBS library.** The prepared RRBS library was run on an Agilent 2100 Bioanalyzer using the high sensitivity DNA kit to determine the quality of the samples. The electropherogram displays a plot of fragment size in the x-axis (bp) versus fluorescence intensity (fluorescence units, FU) in y-axis. Peaks at 35 bp and 10380 bp represent lower and upper markers. The 150- 330 bp peaks represent the RRBS library (size after ligation of the adaptor, this corresponds to the actual size of 40-220 bp DNA fragments).

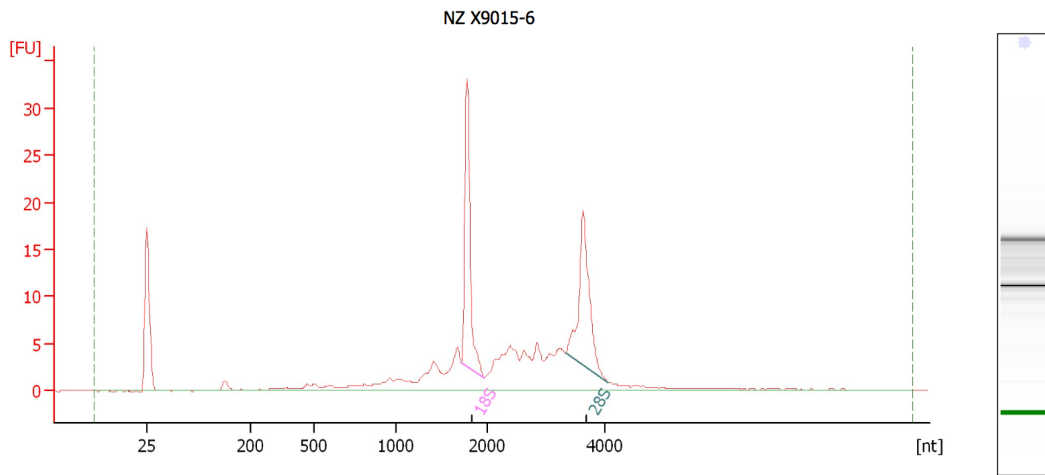

**Overall Results for sample 4 : NZ X9015-6**

|                         |                |                             |                                                                                                                             |
|-------------------------|----------------|-----------------------------|-----------------------------------------------------------------------------------------------------------------------------|
| RNA Area:               | 147.5          | RNA Integrity Number (RIN): | 7.9 (B.02.08)                                                                                                               |
| RNA Concentration:      | 58 ng/ $\mu$ l | Result Flagging Color:      | <span style="background-color: #ccccff; border: 1px solid black; display: inline-block; width: 15px; height: 10px;"></span> |
| rRNA Ratio [28s / 18s]: | 1.0            | Result Flagging Label:      | RIN: 7.90                                                                                                                   |

**Fragment table for sample 4 : NZ X9015-6**

| Name | Start Size [nt] | End Size [nt] | Area | % of total Area |
|------|-----------------|---------------|------|-----------------|
| 18S  | 1,716           | 1,960         | 25.7 | 17.4            |
| 28S  | 3,321           | 4,047         | 24.7 | 16.7            |

**Fig. S6: Bioanalyzer electropherogram of X9015 RNA-Seq library.** The prepared RRBS library was run on an Agilent 2100 Bioanalyzer using the high sensitivity RNA nano kit (from Agilent) to determine the quality of the samples. The electropherogram displays a plot of fragment size in the x-axis (nt) versus fluorescence intensity (fluorescence units, FU) in y-axis. RNA Integrity Number (RIN) is shown below in the figure. Further, RNA concentration, and ratio of different RNA submits are shown.

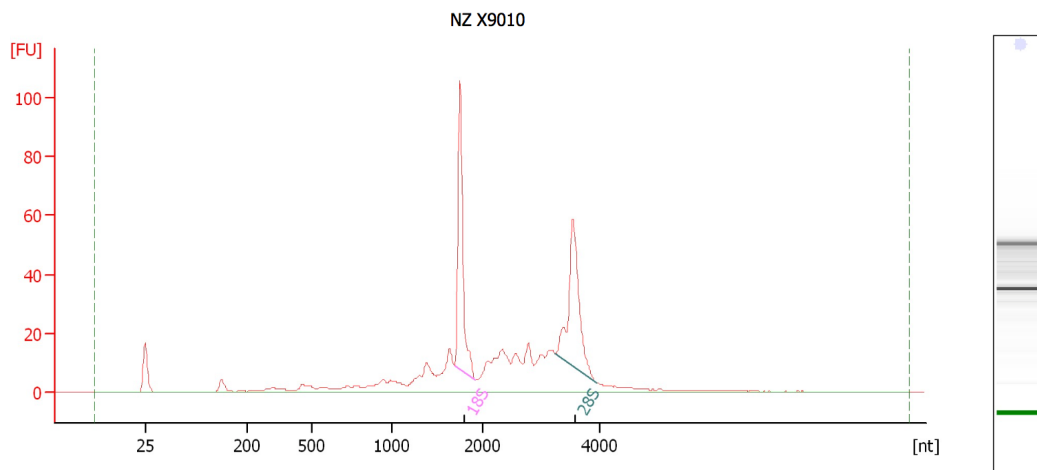

**Overall Results for sample 7 : NZ X9010**

|                         |           |                             |                                                                                                                             |
|-------------------------|-----------|-----------------------------|-----------------------------------------------------------------------------------------------------------------------------|
| RNA Area:               | 462.3     | RNA Integrity Number (RIN): | 7.8 (B.02.08)                                                                                                               |
| RNA Concentration:      | 183 ng/μl | Result Flagging Color:      | <span style="background-color: #ccccff; border: 1px solid black; display: inline-block; width: 20px; height: 10px;"></span> |
| rRNA Ratio [28s / 18s]: | 0.9       | Result Flagging Label:      | RIN: 7.80                                                                                                                   |

**Fragment table for sample 7 : NZ X9010**

| Name | Start Size [nt] | End Size [nt] | Area | % of total Area |
|------|-----------------|---------------|------|-----------------|
| 18S  | 1,686           | 1,922         | 85.0 | 18.4            |
| 28S  | 3,240           | 3,956         | 75.3 | 16.3            |

**Fig. S7: Bioanalyzer electropherogram of X9010 RNA-Seq library.** The prepared RRBS library was run on an Agilent 2100 Bioanalyzer using the high sensitivity RNA nano kit (from Agilent) to determine the quality of the samples. The electropherogram displays a plot of fragment size in the x-axis (nt) versus fluorescence intensity (fluorescence units, FU) in y-axis. RNA Integrity Number (RIN) is shown below in the figure. Further, RNA concentration, and ratio of different RNA submits are shown.



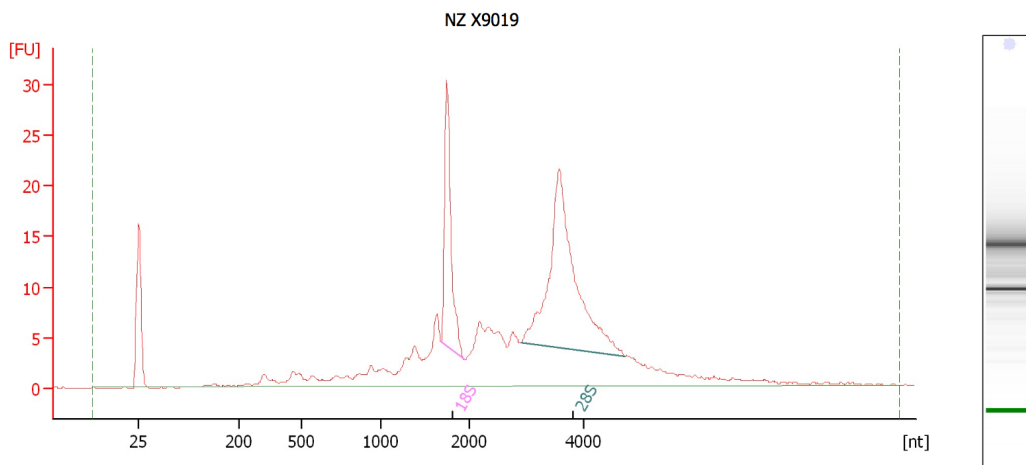

**Overall Results for sample 10 : NZ X9019**

|                         |           |                             |                                                                                                                             |
|-------------------------|-----------|-----------------------------|-----------------------------------------------------------------------------------------------------------------------------|
| RNA Area:               | 258.9     | RNA Integrity Number (RIN): | 8.2 (B.02.08)                                                                                                               |
| RNA Concentration:      | 103 ng/μl | Result Flagging Color:      | <span style="background-color: #ccccff; border: 1px solid black; display: inline-block; width: 15px; height: 10px;"></span> |
| rRNA Ratio [28s / 18s]: | 2.4       | Result Flagging Label:      | RIN: 8.20                                                                                                                   |

**Fragment table for sample 10 : NZ X9019**

| Name | Start Size [nt] | End Size [nt] | Area | % of total Area |
|------|-----------------|---------------|------|-----------------|
| 18S  | 1,678           | 1,944         | 27.9 | 10.8            |
| 28S  | 2,893           | 4,723         | 66.6 | 25.7            |

**Fig. S8: Bioanalyzer electropherogram of X9019 RNA-Seq library.** The prepared RRBS library was run on an Agilent 2100 Bioanalyzer using the high sensitivity RNA nano kit (from Agilent) to determine the quality of the samples. The electropherogram displays a plot of fragment size in the x-axis (nt) versus fluorescence intensity (fluorescence units, FU) in y-axis. RNA Integrity Number (RIN) is shown below in the figure. Further, RNA concentration, and ratio of different RNA submits are shown.

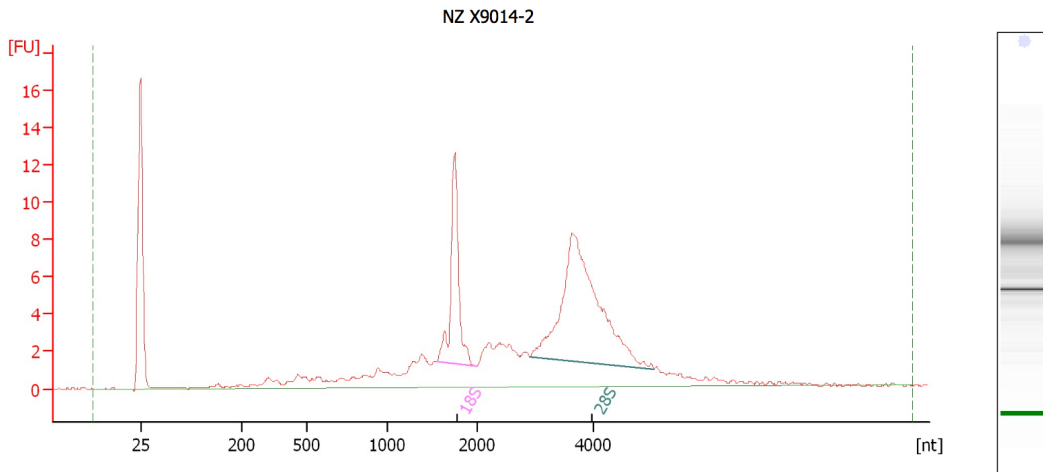

**Overall Results for sample 9 : NZ X9014-2**

|                         |                |                             |                                                                                                                             |
|-------------------------|----------------|-----------------------------|-----------------------------------------------------------------------------------------------------------------------------|
| RNA Area:               | 118.8          | RNA Integrity Number (RIN): | 8.9 (B.02.08)                                                                                                               |
| RNA Concentration:      | 47 ng/ $\mu$ l | Result Flagging Color:      | <span style="background-color: #ccccff; border: 1px solid black; display: inline-block; width: 20px; height: 10px;"></span> |
| rRNA Ratio [28s / 18s]: | 2.5            | Result Flagging Label:      | RIN: 8.90                                                                                                                   |

**Fragment table for sample 9 : NZ X9014-2**

| Name | Start Size [nt] | End Size [nt] | Area | % of total Area |
|------|-----------------|---------------|------|-----------------|
| 18S  | 1,552           | 2,001         | 14.3 | 12.0            |
| 28S  | 2,892           | 5,029         | 35.1 | 29.6            |

**Fig. S9: Bioanalyzer electropherogram of X9014 RNA-Seq library.** The prepared RRBS library was run on an Agilent 2100 Bioanalyzer using the high sensitivity RNA nano kit (from Agilent) to determine the quality of the samples. The electropherogram displays a plot of fragment size in the x-axis (nt) versus fluorescence intensity (fluorescence units, FU) in y-axis. RNA Integrity Number (RIN) is shown below in the figure. Further, RNA concentration, and ratio of different RNA submits are shown.

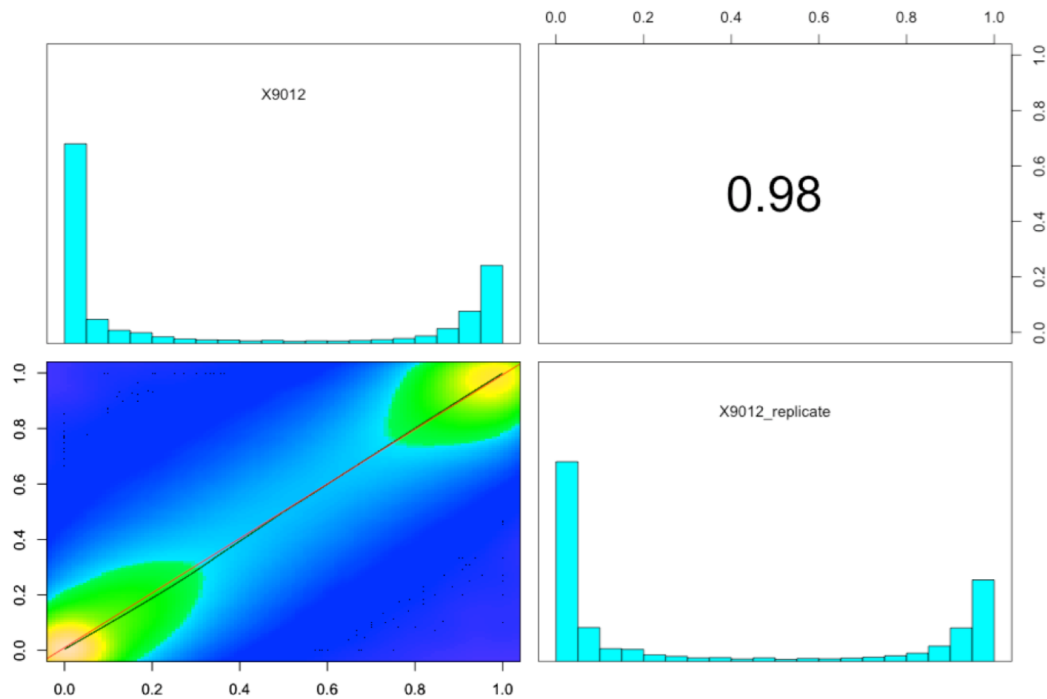

**Fig. S10: Scatter plots of CpG methylation for sample X9012 and X9012\_replicate.** Lower left is the scatter plot of CpG methylation values for each sample. The number on upper right denotes pair-wise CpG base Pearson's correlation score for X9012 and X9012\_replicate samples. The histograms show the frequency of CpG methylation in these two samples. The X and Y axis scales of the scatter plot in lower left was modified to 0.0-1.0 by methylKit program, instead of 0-100 percent methylation as shown in Figure 6.4. In this plot 0.0 represents complete unmethylation (0%) and 1.0 represents complete methylation (100%).

## Supplementary Tables

**Table S1. Neutrophil isolation percentages and DNA concentrations of the sequenced samples**

| <b>Sample ID</b> | <b>Neutrophil isolation (%)</b> | <b>Amount of DNA (<math>\mu</math>g)</b> | <b>260/280 ratio on Nanodrop</b> |
|------------------|---------------------------------|------------------------------------------|----------------------------------|
| X9015            | 96.0                            | 38.5                                     | 1.81                             |
| X9006            | 96.5                            | 27.4                                     | 1.83                             |
| X9010            | 94.7                            | 43.0                                     | 1.87                             |
| X9007            | 97.0                            | 26.5                                     | 1.89                             |
| X9017            | 94.0                            | 49.2                                     | 1.87                             |
| X9019            | 96.0                            | 34.5                                     | 1.87                             |
| X9020            | 97.1                            | 40.9                                     | 1.88                             |
| X9014            | 92.0                            | 20.6                                     | 1.89                             |
| X9016            | 96.5                            | 66.2                                     | 1.86                             |
| X9018            | 90.0                            | 50.0                                     | 1.87                             |
| X9012            | 95.5                            | 68.0                                     | 1.87                             |
| X9021            | 97.4                            | 50.0                                     | 1.88                             |
